# Supplementary material
Source: PubMed Central journal article supplement (PMC1693861)

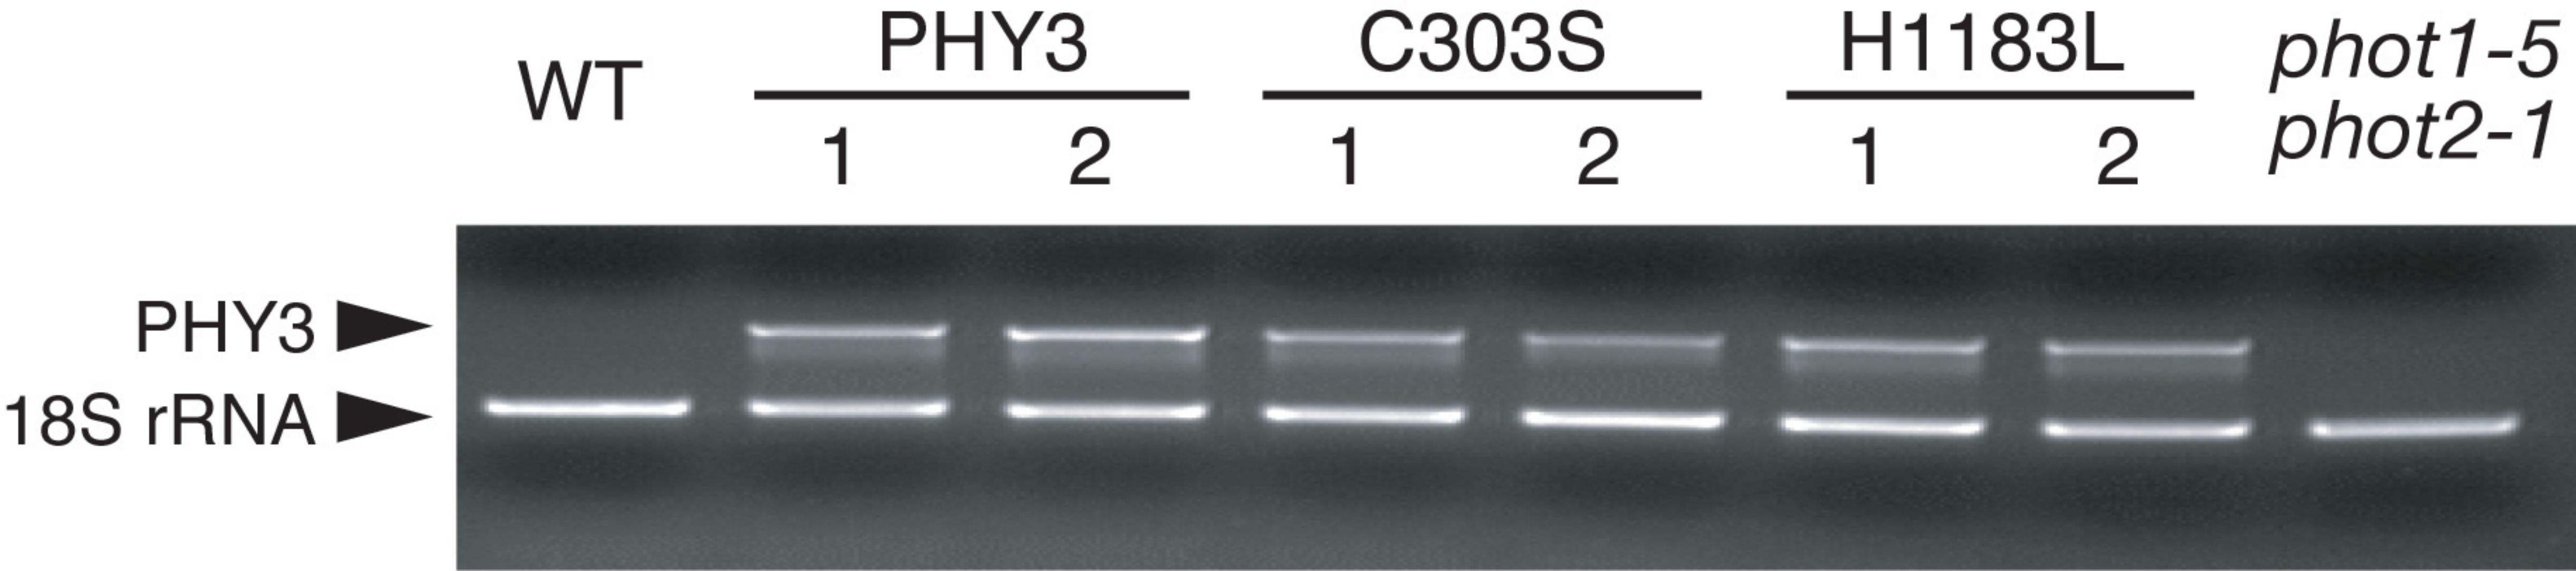

Supplement: pnas_0603569103_1.pdf [file pnas_0603569103_1.pdf]

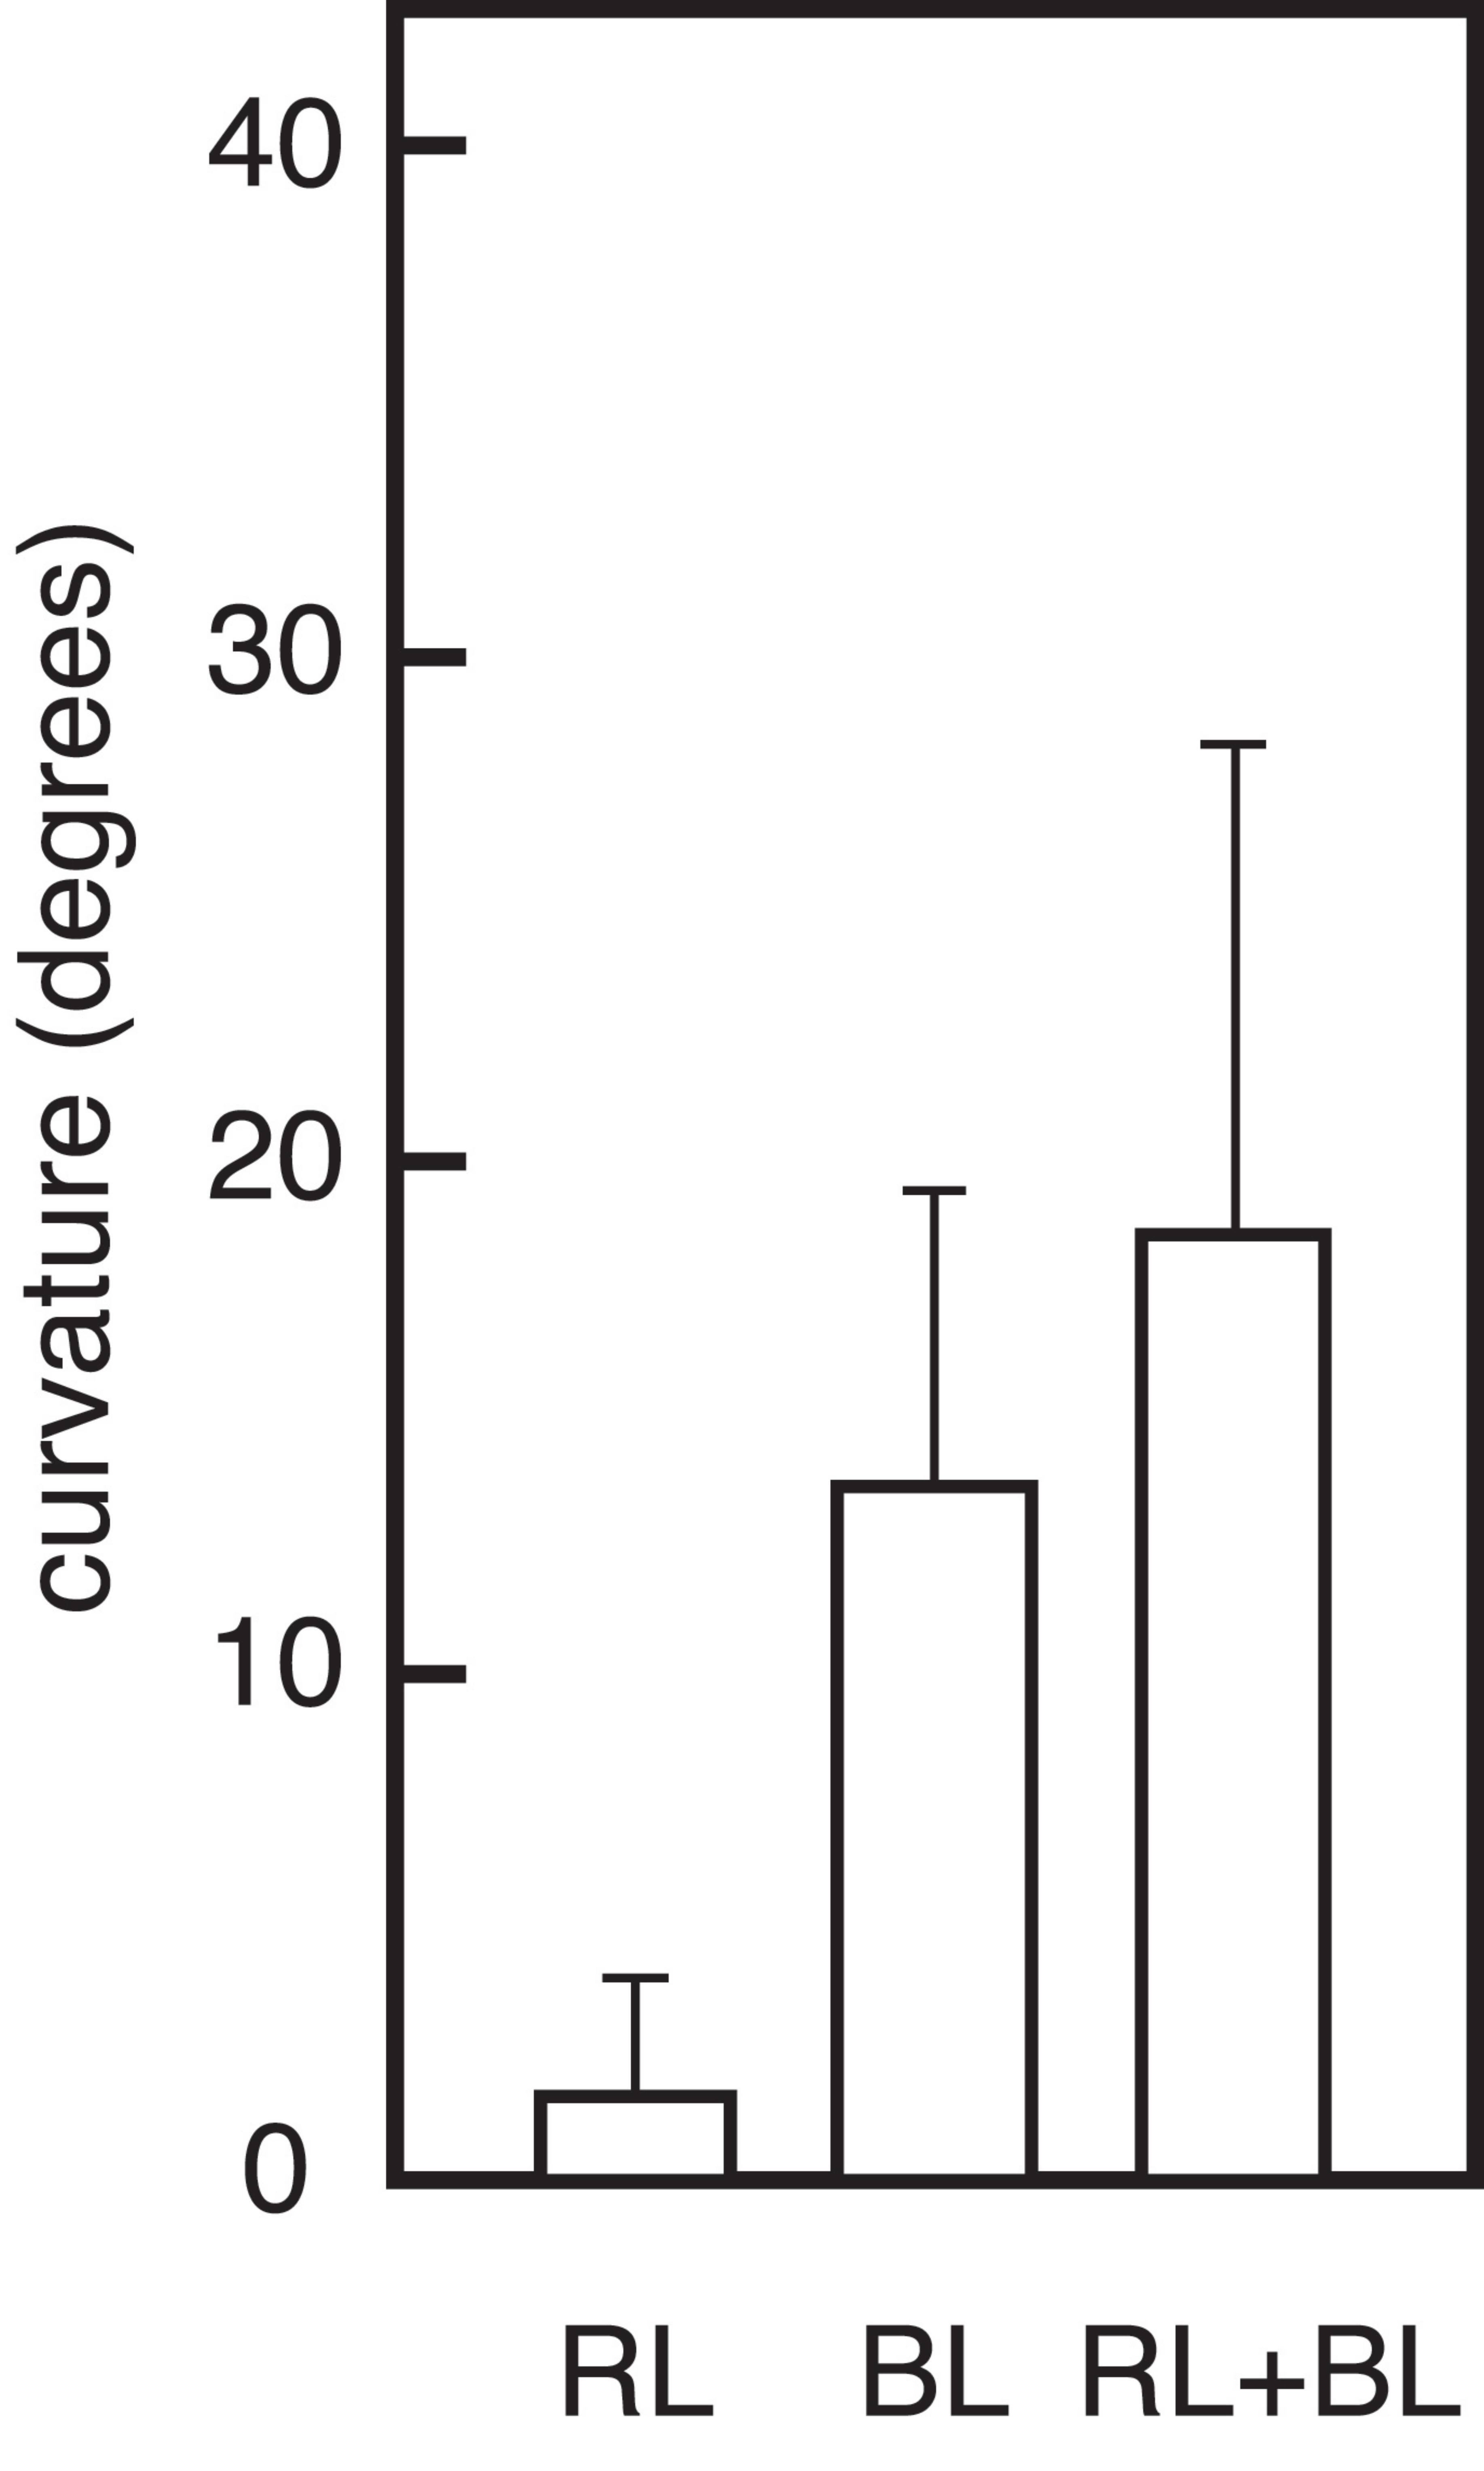

Supplement: pnas_0603569103_2.pdf [file pnas_0603569103_2.pdf]
